# Supplementary material for: Structural basis for tailor-made selective PI3K α/β inhibitors: a computational perspective
Source: Royal Society of Chemistry journal article supplement (doi:10.1039/d0nj04216a), 2020-11-10
Supplement: d0nj04216a1.pdf [file d0nj04216a1.pdf]

## Supplementary Material

# Structural Basis for Tailor-Made Selective PI3K $\alpha/\beta$ inhibitors :A computational perspective

Huibin Wang<sup>a</sup>, Ying Wang<sup>b</sup>, Chunshi Li<sup>c</sup>, Hanxun Wang<sup>c</sup>, Baichun Hu<sup>c</sup>, Rui Wen<sup>c</sup>, Jian Wang<sup>c</sup>,

Fengjiao Zhang<sup>b\*</sup>

*a. School of Pharmacy, Shenyang Pharmaceutical University, Shenyang 110016, People's Republic of China*

*b. Wuya College of Innovation, Shenyang Pharmaceutical University, Shenyang 110016, People's Republic of China*

*c. Key Laboratory of Structure-Based Drug Design & Discovery of Ministry of Education, Shenyang Pharmaceutical University, Shenyang 110016, People's Republic of China*

Wang H. and Wang Y. contributed equally to this work.

Corresponding author: Fengjiao Zhang, E-mail: zhangfengjiao@syphu.edu.cn.

## Table of contents

|                         |           |
|-------------------------|-----------|
| <i>Figure S1</i> .....  | <b>3</b>  |
| <i>Figure S2</i> .....  | <b>4</b>  |
| <i>Figure S3</i> .....  | <b>5</b>  |
| <i>Figure S4</i> .....  | <b>6</b>  |
| <i>Figure S5</i> .....  | <b>7</b>  |
| <i>Figure S6</i> .....  | <b>8</b>  |
| <i>Figure S7</i> .....  | <b>9</b>  |
| <i>Figure S8</i> .....  | <b>10</b> |
| <i>Figure S9</i> .....  | <b>11</b> |
| <i>Figure S10</i> ..... | <b>12</b> |
| <i>Table S1</i> .....   | <b>13</b> |
| <i>Table S2</i> .....   | <b>14</b> |

|                    |                                                               |      |
|--------------------|---------------------------------------------------------------|------|
| P42338 PK3CB_HUMAN | MCFSFIMPAMADILDIWAVDSQIASDGSIPVDFLLPTGIYIQLEVPREATISYIKQMLW   | 60   |
| Q8BT19 PK3CB_MOUSE | -----MPPAMADNLDIWAVDSQIASDGATSVDFLLPTGIYIQLEVPREATISYIKQMLW   | 54   |
|                    | ***** :*                                                      |      |
| P42338 PK3CB_HUMAN | KQVHNYPMFNLMDIDSYMFACVNTAVYEELEDETRRLCDVRPFLPVLKLVTRSCDPGE    | 120  |
| Q8BT19 PK3CB_MOUSE | KQVHNYPMFNLMDIDSYMFACVNTAVYEELEDETRRLCDVRPFLPVLKLVTRSCDPAE    | 114  |
|                    | ***** *                                                       |      |
| P42338 PK3CB_HUMAN | KLDSKIGVLIGKGLHEFDLKDPEVNEFRKMRKFSEEEKILSLVGLSWMDWLKQTYPPEH   | 180  |
| Q8BT19 PK3CB_MOUSE | KLDSKIGVLIGKGLHEFDALKDPEVNEFRKMRKFSEAKIQSLVGLSWIDWLKHTYPPPEH  | 174  |
|                    | ***** :***** *                                                |      |
| P42338 PK3CB_HUMAN | EPSIPENLEDKLYGGKLVAVHFENCQDVFSFQVSPNMNPIKVNELAIQKRLTIHGKED    | 240  |
| Q8BT19 PK3CB_MOUSE | EPSVLENLEDKLYGGKLVAVHFENSQDVFSFQVSPNLNPIKINELAIQKRLTIRGKED    | 234  |
|                    | ***: ***** :***** :***** :***** :*****                        |      |
| P42338 PK3CB_HUMAN | VSPYDYVLQVSGRVEYVFGDHPILQFQYIRNCVMNRALPHFILVECKIKKMYEQEMIAI   | 300  |
| Q8BT19 PK3CB_MOUSE | ASPCDYVLQVSGRVEYVFGDHPILQFQYIRNCVMNRALPHFILVECKIKKMYEQEMIAI   | 294  |
|                    | . ** ***** :*****                                             |      |
| P42338 PK3CB_HUMAN | EAAINRNSNLPLPLPPKTRISHVWENNPFQIVLVKGNKLNTEETVKVHVRAGLPHG      | 360  |
| Q8BT19 PK3CB_MOUSE | EAAINRNSNLPLPLPPKTRVISHVWENNPFQITLVKGNKLNTEETVKVHVRAGLPHG     | 354  |
|                    | ***** :***** :***** *                                         |      |
| P42338 PK3CB_HUMAN | TELLCKTIVSSEVSGKNDHIWNEPLEFDINICDLPRMARLCAVYAVLDKVKTKKSTKI    | 420  |
| Q8BT19 PK3CB_MOUSE | TELLCKTVSSEISGKNDHIWNEQLEFDINICDLPRMARLCAVYAVLDKVKTKKSTKI     | 414  |
|                    | ***** :***** :***** *****                                     |      |
| P42338 PK3CB_HUMAN | NPSKYQTIKAGKVHYPVAVVNTMVFDFKGLRGTGDIILHSSWSPFDEEMLNPMGTQ      | 480  |
| Q8BT19 PK3CB_MOUSE | NPSKYQTIKAGKVHYPVAVVNTMVFDFKGLRSGDVIILHSSWSPFDEEMLNPMGTQ      | 474  |
|                    | ***** :***** :*****                                           |      |
| P42338 PK3CB_HUMAN | TNPYTENATALHVKFPENKQPYYPFDKIEKAAEIASSDSANVSSRGGKFLPVLKE       | 540  |
| Q8BT19 PK3CB_MOUSE | TNPYAENATALHITFPENKQPCYYPFDKIEKAAELASGDANVSSRGGKFLAVLKE       | 534  |
|                    | ****:***** :***** ***** :*. *****                             |      |
| P42338 PK3CB_HUMAN | ILDRDPLSQLCENEMDLIWTLRQDREIFPQSLPKLLLSIKWNKLEDVAQLQALLQIWP    | 600  |
| Q8BT19 PK3CB_MOUSE | ILDRDPLSQLCENEMDLIWTLRQDRENFPQSLPKLLLSIKWNKLEDVAQLQALLQIWP    | 594  |
|                    | ***** *****                                                   |      |
| P42338 PK3CB_HUMAN | LPPREALELDFNYPDQYVREYAVGCLRQMSDEELSQYLLQLVQLVKYEPFLDCALSRL    | 660  |
| Q8BT19 PK3CB_MOUSE | LPPREALELDFNYPDQYVREYAVGCLRQMSDEELSQYLLQLVQLVKYEPFLDCALSRL    | 654  |
|                    | ***** *****                                                   |      |
| P42338 PK3CB_HUMAN | LERALGNRRIGQFLFVHLRSEVHIPAVSVQFGVILEAYCRGVSVGHMKVLSKQVEALNKL  | 720  |
| Q8BT19 PK3CB_MOUSE | LERALDNRRIGQFLFVHLRSEVHTPAVSVQFGVILEAYCRGVSVGHMKVLSKQVEALNKL  | 714  |
|                    | ****. ***** *****                                             |      |
| P42338 PK3CB_HUMAN | TLNSLIKLNKLNRAKGEAMHTCLKQSAYREALSDLQSPLNPCVILSELYVEKCKYMD     | 780  |
| Q8BT19 PK3CB_MOUSE | TLNSLIKLNKLNRAKGEAMHTCLKQSAYREALSDLQSPLNPCVILSELYVEKCKYMD     | 774  |
|                    | ***** *****                                                   |      |
| P42338 PK3CB_HUMAN | SKMKPLWL VYNNKVFGEDESVGVIFKNGDDLQDMLTLQMLRLMDLLWKEAGLDLRMLPYG | 840  |
| Q8BT19 PK3CB_MOUSE | SKMKPLWL VYSSRAFGEDESVGVIFKNGDDLQDMLTLQMLRLMDLLWKEAGLDLRMLPYG | 834  |
|                    | ***** . : *****                                               |      |
| P42338 PK3CB_HUMAN | CLATGDRSGLIEVVSTSETIADIQLNSSNVAATAAFNKDALLNWLKEYNSGDDLDRATEE  | 900  |
| Q8BT19 PK3CB_MOUSE | CLATGDRSGLIEVVSTSETIADIQLNSSNVAATAAFNKDALLNWLKEYNSGDDLDRATEE  | 894  |
|                    | ***** *****                                                   |      |
| P42338 PK3CB_HUMAN | FTLSCAGYCVASYVLGIGDRHSDNIMVKKTGQLFHIDFGHILGNFKSKFGIKRERVPFIL  | 960  |
| Q8BT19 PK3CB_MOUSE | FTLSCAGYCVASYVLGIGDRHSDNIMVKKTGQLFHIDFGHILGNFKSKFGIKRERVPFIL  | 954  |
|                    | ***** *****                                                   |      |
| P42338 PK3CB_HUMAN | TYDFIHVIQGGKTGNTKFGFRQCCEDAYLILRRHGNTLITLFAFMLTAGLPELTSVKD    | 1020 |
| Q8BT19 PK3CB_MOUSE | TYDFIHVIQGGKTGNTKFGFRQCCEDAYLILRRHGNTLITLFAFMLTAGLPELTSVKD    | 1014 |
|                    | ***** *****                                                   |      |
| P42338 PK3CB_HUMAN | IQLKDSLALGKSEEEALKQFKQKQFDEALRESWTTKVNWMAHTVRKDYRS            | 1070 |
| Q8BT19 PK3CB_MOUSE | IQLKDSLALGKSEEEALKQFKQKQFDEALRESWTTKVNWMAHTVRKDYRS            | 1064 |
|                    | ***** *****                                                   |      |

|                     |          |
|---------------------|----------|
| Identical positions | 1020     |
| Identity            | 95.86%   |
| Similar positions   | 33       |
| Program             | CLUSTALO |

**Figure S1.** UniProt Align results of human PI3K $\beta$  and mouse PI3K $\beta$  protein sequence.

|        |             |                                                               |      |
|--------|-------------|---------------------------------------------------------------|------|
| P42336 | PK3CA_HUMAN | MPPR-PSSGELWGIHL---MPPRILVECLLPNGMIVTLECLREATLITIKHELKFKEARKY | 56   |
| Q8BT19 | PK3CB_MOUSE | MPPAMADNLDIWAVDSQIASDGAISVDFLLPTGIYIQLEVPREATISYIKQLWKQVHNY   | 60   |
| P42336 | PK3CA_HUMAN | PLHQLLQDESSYIFVSVTQEAEREFFDETRRLCDLRFQPFKLVIEPVGNRREEKILNRE   | 116  |
| Q8BT19 | PK3CB_MOUSE | PMFNLLMIDISYMFACVNTAVYELEDETRRLCDVRPFLPVLKLVTRSCDPAE-KLDSK    | 119  |
| P42336 | PK3CA_HUMAN | IGFAIGMPVCEFDVMKDPEVQDFRRNILNVCKEAVDLRDLNSPHSRAMYVYPPNVESSPE  | 176  |
| Q8BT19 | PK3CB_MOUSE | IGVLIGKGLHEFDALKDPEVNEFRMRKFSSEAKIQSLVGLSWIDWLKHTYPEHE--PS    | 177  |
| P42336 | PK3CA_HUMAN | LPKHIYNKLDKGQIIVVIWVIVSPNNDKQKYTLKINHDCVPEQVIAEAIKKKTRSMLLSS  | 236  |
| Q8BT19 | PK3CB_MOUSE | VLENLEDKLYGGKLVVAHF---ENSQDVFSFQVSPNLNPIKINELAIQKRLT-IRGKE    | 232  |
| P42336 | PK3CA_HUMAN | EQLKLCVLEYQGKYILKVCGCDEYFLEKYPLSQYKIRSCIMLGRMPNMLMAKESLYSQ    | 296  |
| Q8BT19 | PK3CB_MOUSE | D-----EASPCDYLQVSRVEYVFGDHPLIQFQYIRNCVMNRTLPHFILVECKIKKM      | 286  |
| P42336 | PK3CA_HUMAN | LPMDCTMPSYSRRISTATPYM---NGETSTKSLWVINSALRIKILCATYVNVNIRDIDK   | 353  |
| Q8BT19 | PK3CB_MOUSE | YEQEMIAIEAAINRNSNLPLPPKTRVISHIWDNNPFQITLVKGN--KLNTETVK        | 344  |
| P42336 | PK3CA_HUMAN | IYVRTGIYHGGEPLCDNVNTQRVPC-SNPRWNEWLNVDIYIPDLPRARLCLSCSVKGR    | 412  |
| Q8BT19 | PK3CB_MOUSE | VHVRAGLPHGTELLCKTVVSSISGKNDHIWNEQLEFDINICDLPRMARLCAVAVVLDK    | 404  |
| P42336 | PK3CA_HUMAN | -----KGAKEEHCPALWGNINLFDYDTLVSGKMALNLWP-VPHGLE                | 453  |
| Q8BT19 | PK3CB_MOUSE | VKTKKSTKTINPSKYQTIKAGKVHYPAVWNTMVFDFKQQLRSGDVLHSSWSSFDELE     | 464  |
| P42336 | PK3CA_HUMAN | DLLNPIGVTGSNPNKETPC-LELEFDWFS-SVVKFPDMSV-IEEHANWSVSREAGFSYSH  | 510  |
| Q8BT19 | PK3CB_MOUSE | EMLNPMGTQVNTPYAENATALHITFPENKKQPCYPPFDKIEKAELASGDSAN-----     | 519  |
| P42336 | PK3CA_HUMAN | AGLSNRLARDNELRENDKQLKAISTRDPLSEITEQEKDFLWHRHYCV-TIPEILPKLL    | 569  |
| Q8BT19 | PK3CB_MOUSE | --VSS-----RGGKFLAVLKEILDRDPLSLCENEMDLIWTLRQDCRENFQPSLPKLL     | 571  |
| P42336 | PK3CA_HUMAN | LSVKWNSRDEVAQMYCLVKDWPPIKPEQAMELDCNYPDPVVRGFAVRCLEKYLTDKLS    | 629  |
| Q8BT19 | PK3CB_MOUSE | LSIKWNKLEDAQLQALLQIWPKLPREALELDFNYPDQYVREYAVGCLRQ-MSDEELS     | 630  |
| P42336 | PK3CA_HUMAN | QYLIQLVQLVLYEQYLDNLLVRFLLKKALTNQRIGHFFFWHLKSEMHNKTVSQRFGLLLE  | 689  |
| Q8BT19 | PK3CB_MOUSE | QYLLQLVQLVLYEPPFLDCALSRFLLEALDNRRIGQFLFWHLRSEVHTPAVSVQFGVILE  | 690  |
| P42336 | PK3CA_HUMAN | SYCRACGMYLKHLNRQVEAMEKLIINLTDILKQEKDETQKVQMKFLVEQMRPDPFMDALQ  | 749  |
| Q8BT19 | PK3CB_MOUSE | AYCRGVSGHMKVLSKQVEALNKLKTLNLSLIKLVNAVKLSRAKGEAMHTCLKQSAYREALS | 750  |
| P42336 | PK3CA_HUMAN | GFLSPLNPAHQGNLRLLEECRIMSSAKRPLWLNWENPDIMSELLFQNNIEIFKNGDDLRLQ | 809  |
| Q8BT19 | PK3CB_MOUSE | DLQSPLNPCVILSELYVECKYKMSKMKPLWLVYSSRAFGE---DSVGVIFKNGDDLRLQ   | 806  |
| P42336 | PK3CA_HUMAN | DMLTLQIRIMENIWQNQGLDLRMLPYGCLSIGDCVGLIEVVRNHTIMQIQCKGG-LKG    | 868  |
| Q8BT19 | PK3CB_MOUSE | DMLTLQMLRMDLWKEAGLDRMLPYGCLATGDRSGLIEVVSTSETIADIQLNSSNVAA     | 866  |
| P42336 | PK3CA_HUMAN | ALQFNSTLHQWLKDKNGEYDAAIDLFTTRSCAGYCVATFLLGIGDRHNSNIMVKDDGQ    | 928  |
| Q8BT19 | PK3CB_MOUSE | TAAFNKDALLNWLKEYNSGDDLDRAIEEFTLSCAGYCVASYVLGIGDRHSDNIMVKKTGQ  | 926  |
| P42336 | PK3CA_HUMAN | LFHIDFGHFLDHKKKFGYKRERVPFVLTQDFLIVISKAQECTKTREFERFQEMCYKAY    | 988  |
| Q8BT19 | PK3CB_MOUSE | LFHIDFGHILGNFKSFKGIRERVPFILTDFIHIQGGKGTG--NTEKFRFRQCCEDAY     | 984  |
| P42336 | PK3CA_HUMAN | LAIRQHANLFINLFSMMLGSGMPELQSFDIAYIRKTLALDKTEQEALEYFMKQMNDAHH   | 1048 |
| Q8BT19 | PK3CB_MOUSE | LILRRHGNLFTLFLMLTAGLPELTSVKDIQYLKDSLALGKSEEEALKQFKQFDEALR     | 1044 |
| P42336 | PK3CA_HUMAN | GGWTTKMDWIFHTIKQHALN                                          | 1068 |
| Q8BT19 | PK3CB_MOUSE | ESWTTKVNWAHTVRKDYRS                                           | 1064 |

|                     |          |
|---------------------|----------|
| Identical positions | 426      |
| Identity            | 41.28%   |
| Similar positions   | 348      |
| Program             | CLUSTALO |

**Figure S2.** UniProt Align results of human PI3K $\alpha$  and mouse PI3K $\beta$  protein sequence.

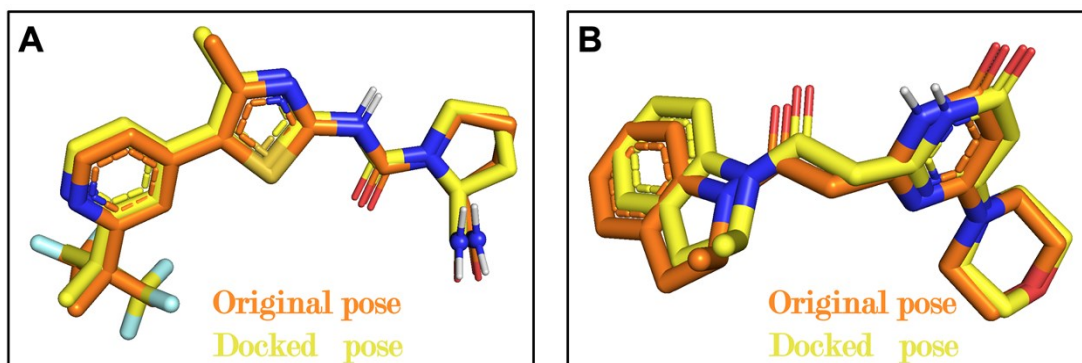

**Figure S3.** Comparison of the predicted and experimental poses for (A) PI3K $\alpha$ , RMSD=0.637 Å (PDB ID:4JPS) and (B) PI3K $\beta$ , RMSD =0.260 Å (PDB ID:4BFR). Orange sticks represent the experimental pose extracted from X-ray structure and yellow sticks represent docked poses.

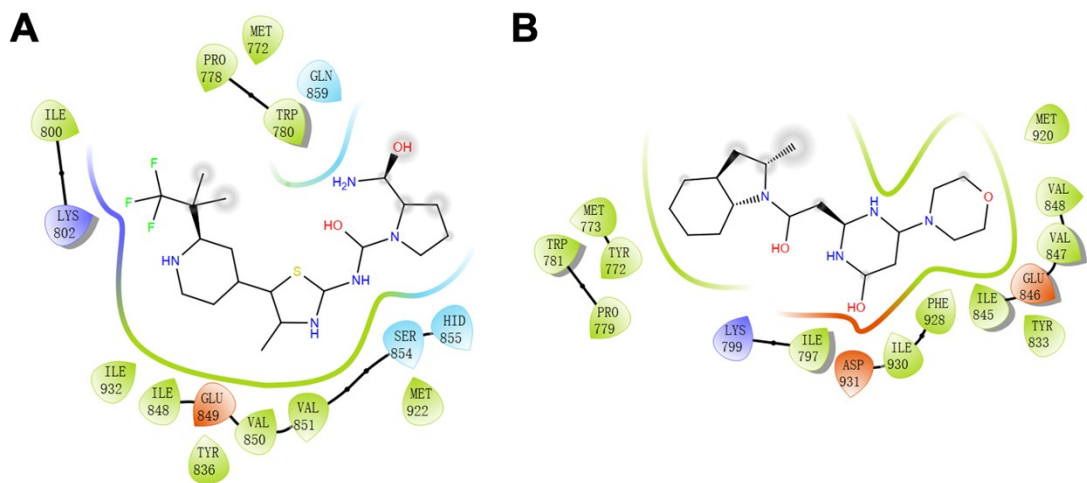

**Figure S4.** The docking results for the crystal ligands (A) PI3K $\alpha$  (PDB ID:4JPS) and (B) PI3K $\beta$  (PDB ID:4BFR).

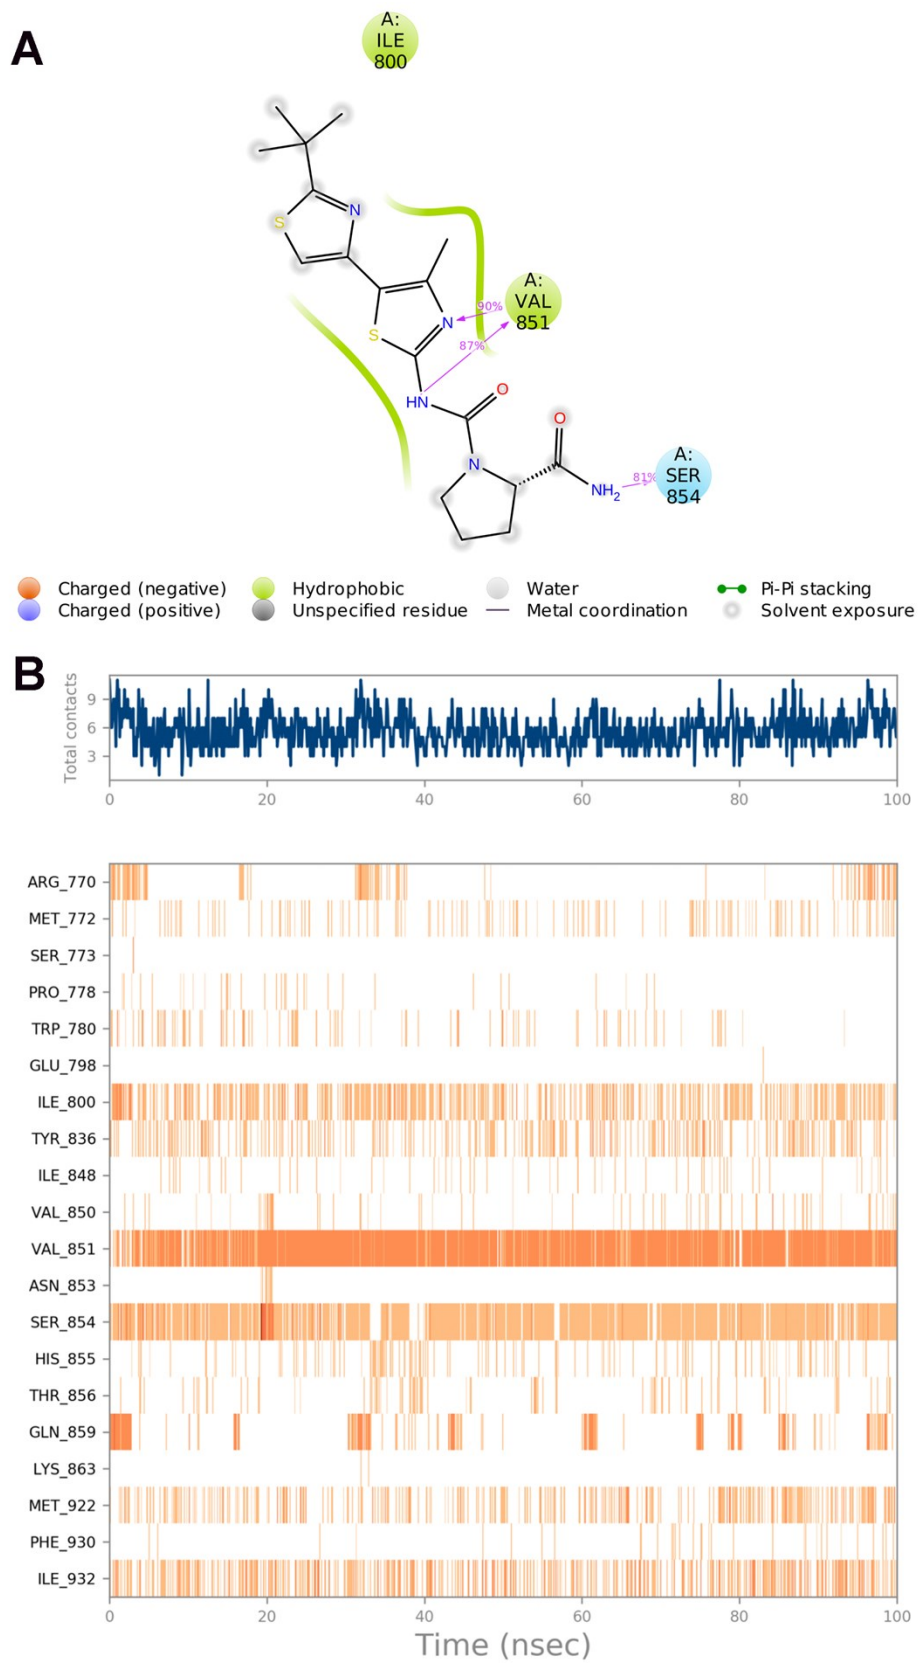

**Figure S5.** Ligand-Protein contacts of PI3K $\alpha$ /Compd1 complex.

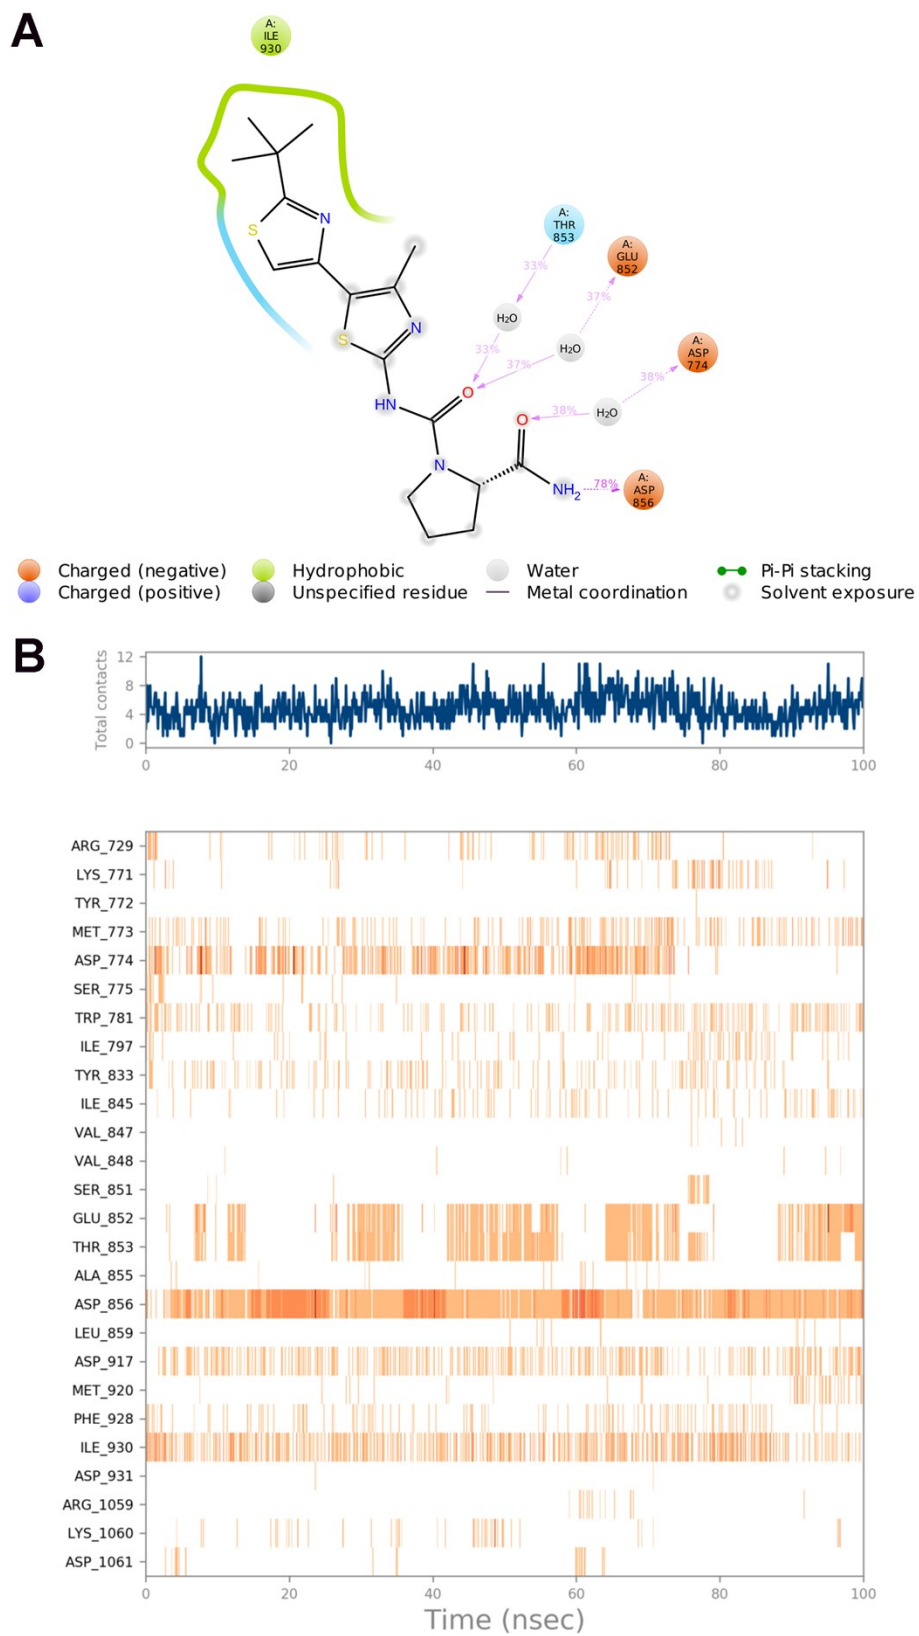

**Figure S6.** Ligand-Protein contacts of PI3K $\beta$ /Compd1 complex.



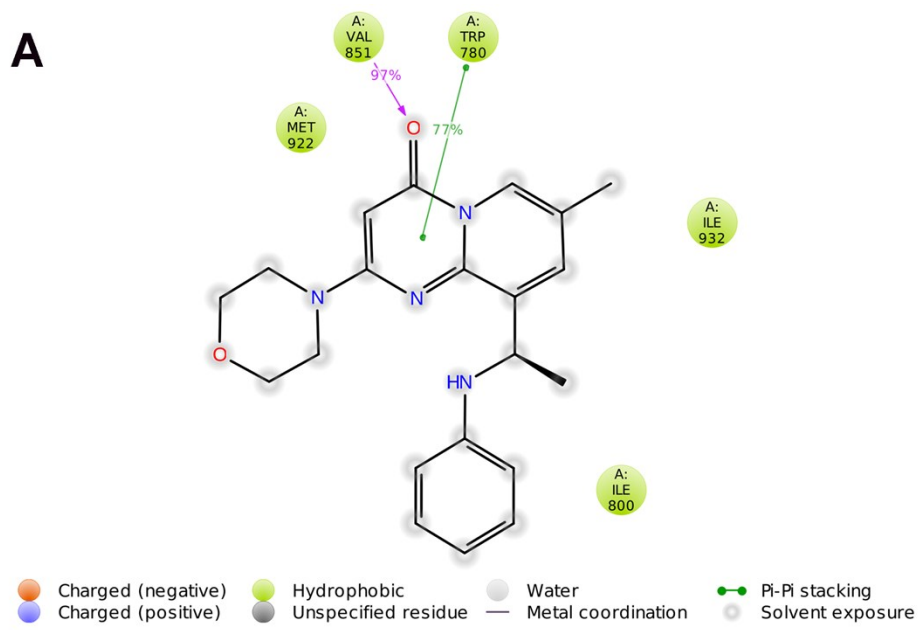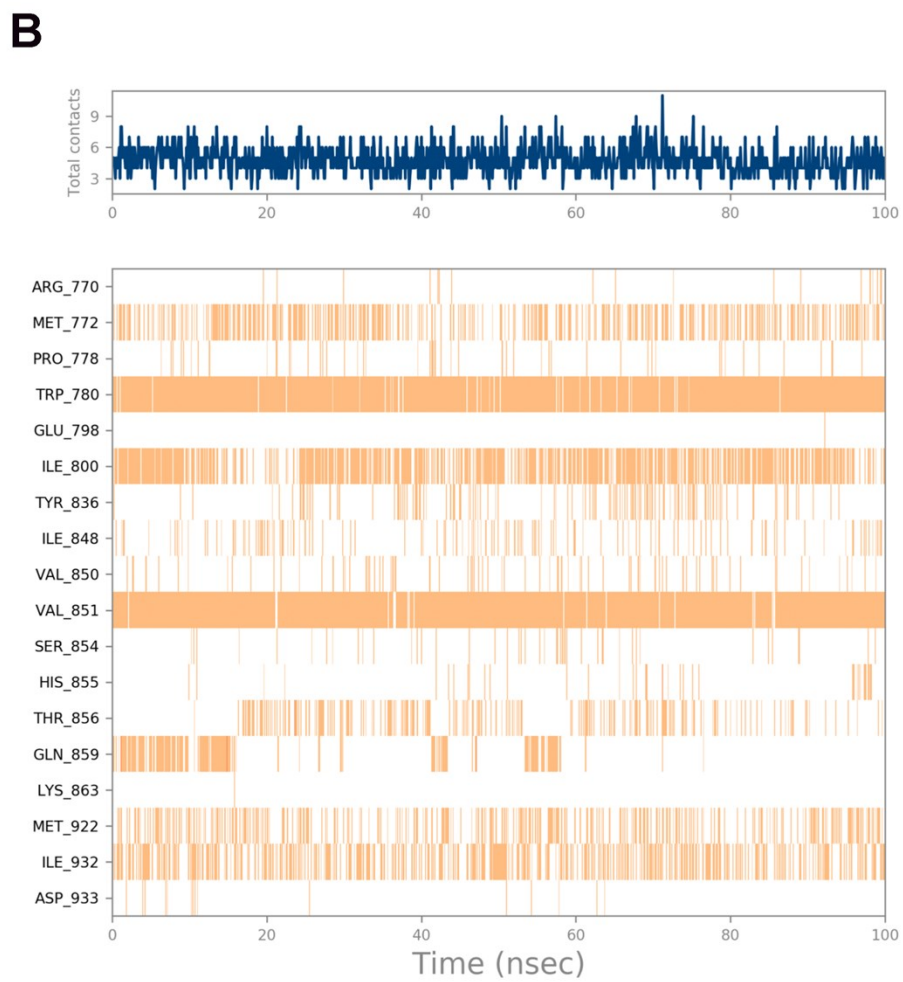

**Figure S7.** Ligand-Protein contacts of PI3K $\alpha$ /Compd2 complex.

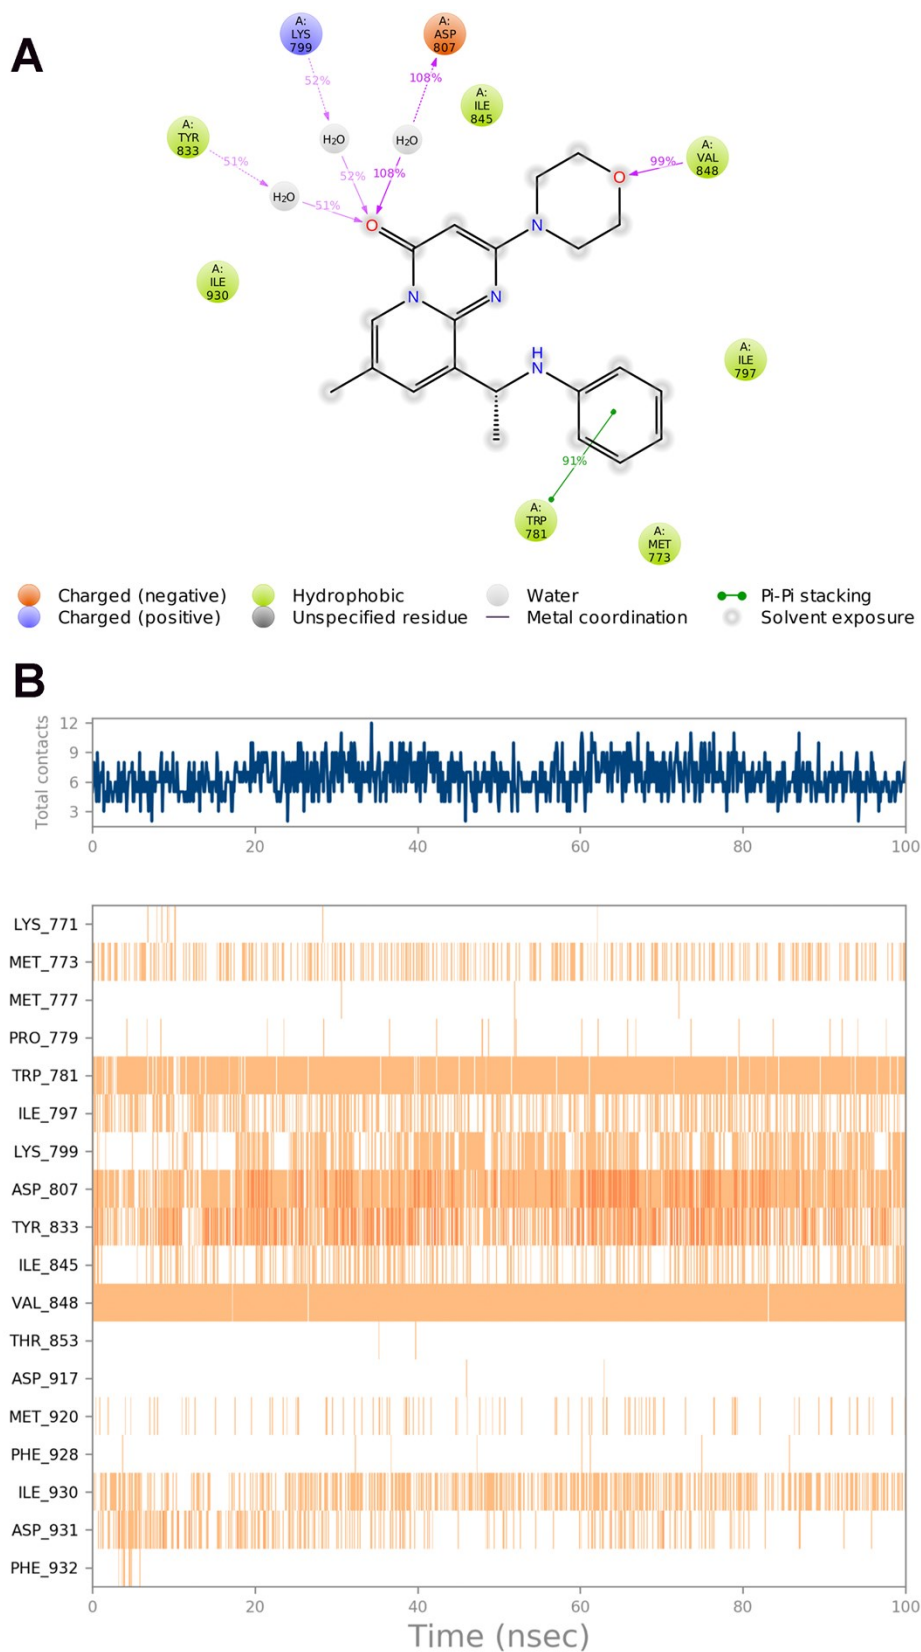

**Figure S8.** Ligand-Protein contacts of PI3K $\beta$ /Compd2 complex.

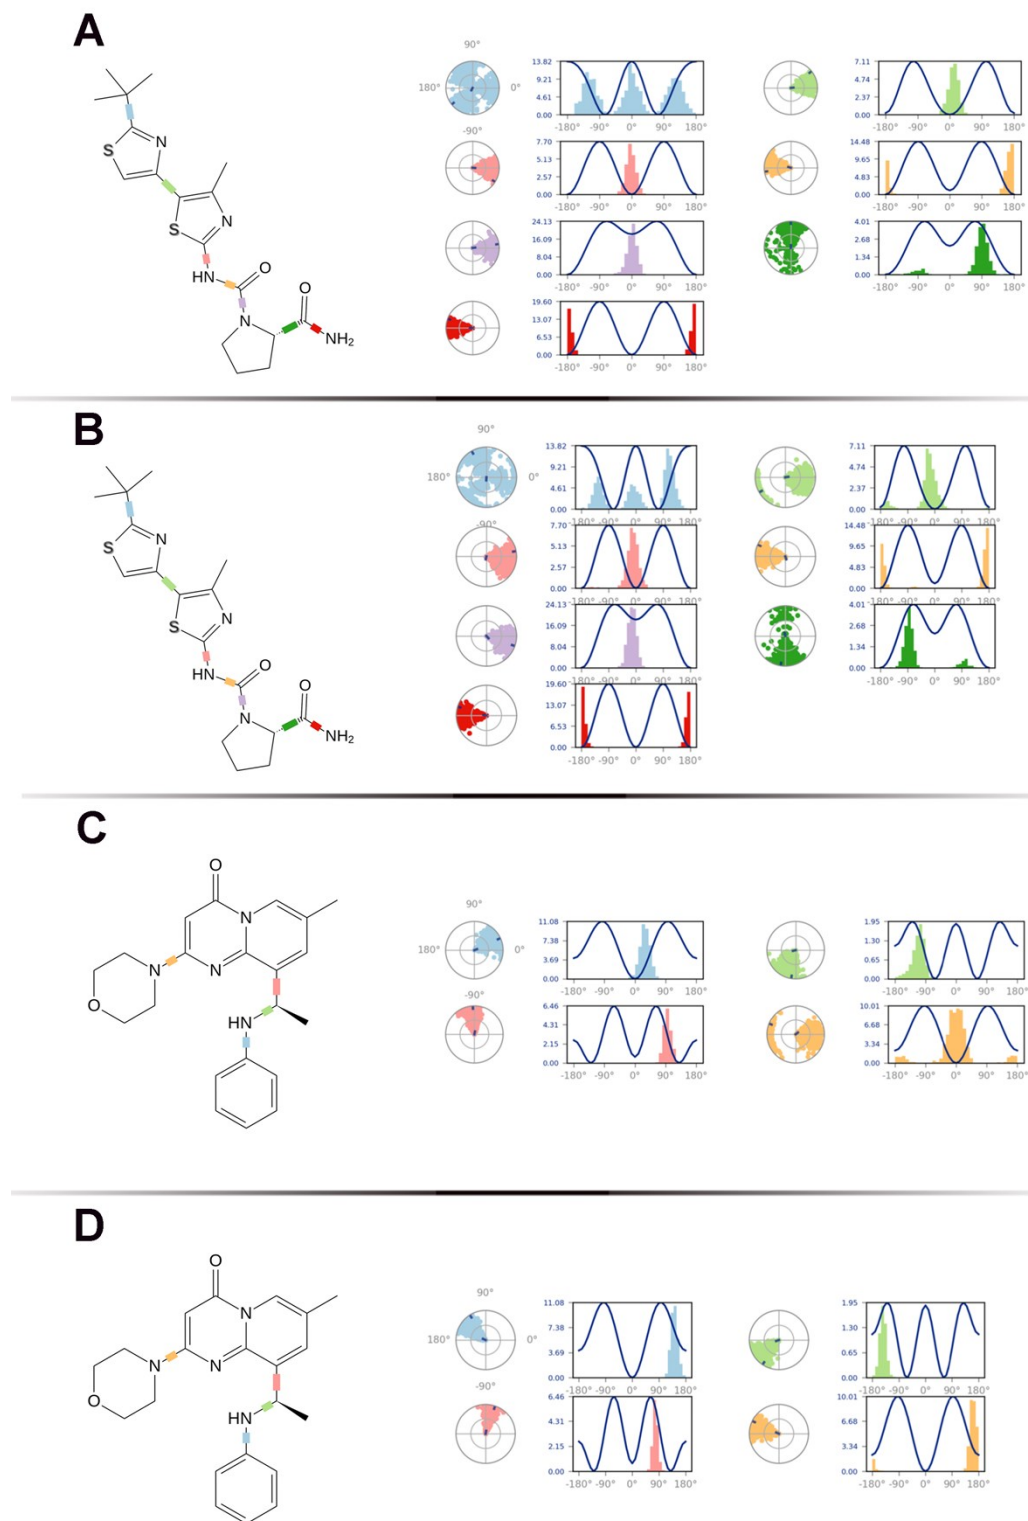

**Figure S9.** Ligand Torsion Profile of four complexes. (A) PI3K $\alpha$ /Compd1. (B) PI3K $\beta$ /Compd1. (C) PI3K $\alpha$ /Compd2. (D) PI3K $\beta$ /Compd2.

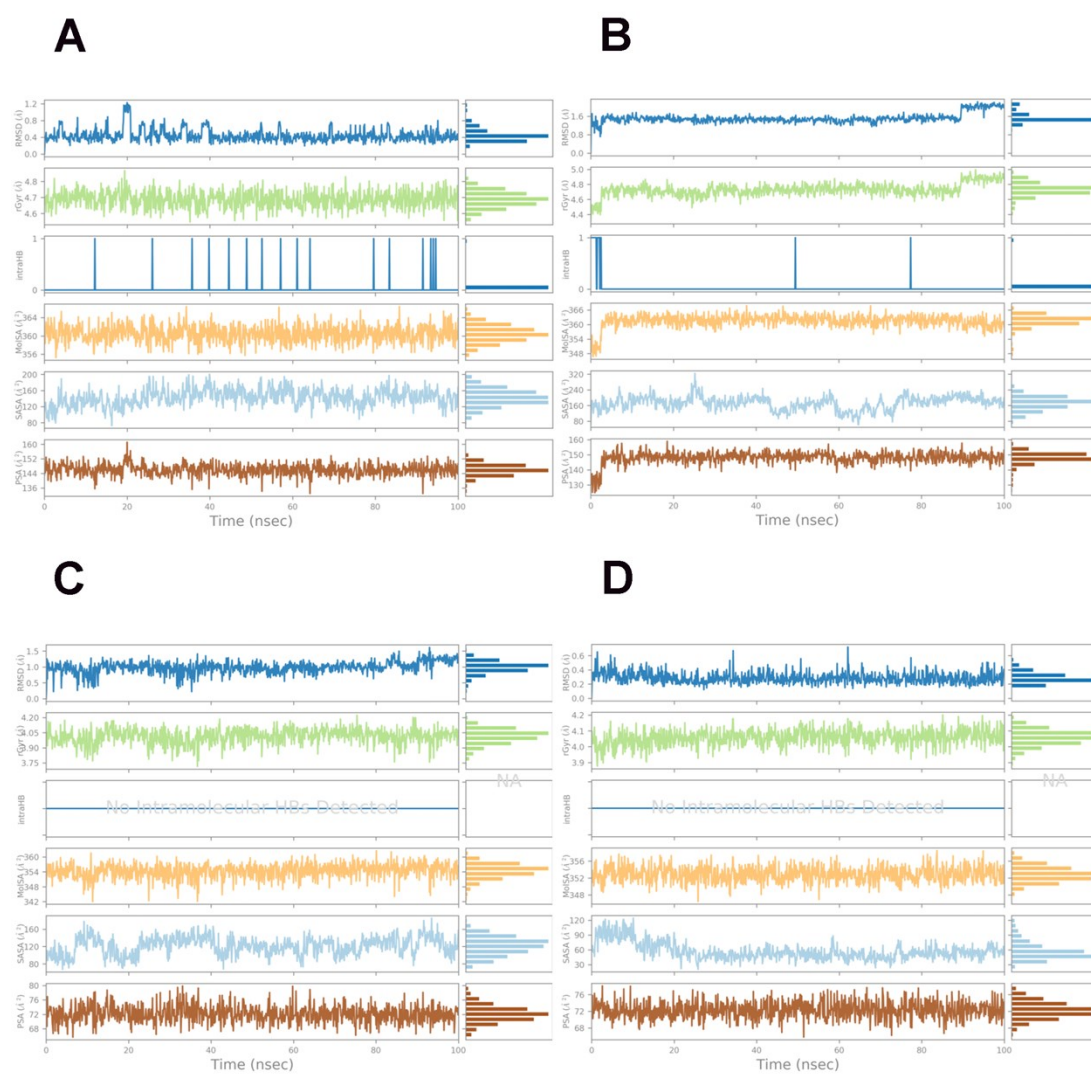

**Figure S10.** Variation in the ligand's properties w.r.t time during the 100 ns MD simulation. (A) PI3K $\alpha$ /Compd1. (B) PI3K $\beta$ /Compd1. (C) PI3K $\alpha$ /Compd2. (D) PI3K $\beta$ /Compd2.

**Table S1** Key residues of docking results based on PI3K $\alpha/\beta$ .

| Entry     | Hydrogen bonds                   | Surrounding residues                                                                                                                                                                                 |
|-----------|----------------------------------|------------------------------------------------------------------------------------------------------------------------------------------------------------------------------------------------------|
| $\alpha$  |                                  |                                                                                                                                                                                                      |
| Compd1    | VAL851,SER854,<br>GLN859         | ARG770,MET772,SER774,PRO778,TRP780,ILE800,LYS802<br>,TYR836,ILE848,GLU849,VAL850,VAL851,ARG852,ASN853<br>,SER854,HIS855,THR856,GLN859,MET922,<br>PHE930,ILE932,ASP933<br>MET772,TRP780,GLU798,ILE800 |
| Compd2    | GLN859                           | ,TYR836,ILE848,GLU849,VAL850,VAL851,ARG852,ASN853<br>,SER854,HIS855,THR856,GLN859,MET922,PHE930,ILE932<br>,ASP933                                                                                    |
| Co-ligand | VAL851,SER854,<br>GLN859         | ARG770,MET772,SER774,PRO778,TRP780,ILE800,LYS802<br>,TYR836,ILE848,VAL850,VAL851,ARG852,ASN853,SER854,<br>HIS855,THR856,GLN859,MET922,PHE930,ILE932,<br>ASP933                                       |
| $\beta$   |                                  |                                                                                                                                                                                                      |
| Compd1    | LYS771, ARG729,<br>ASP856        | ARG729,LYS771,TYR772,MET773,PRO779,TRP781,<br>ILE797,LYS799,ILE845,ASP856,MET920,ILE930,ASP931                                                                                                       |
| Compd2    | VAL848,ASP931                    | LYS771,TYR772,MET773,PRO779,LEU780,TRP781,LYS799,<br>TYR833,ILE845,GLU846,VAL847,VAL848,SER851,THR853,<br>MET920,ILE930,ASP931                                                                       |
| Co-ligand | LYS799,TYR833,<br>VAL848, ASP931 | LYS771,TYR772,MET773,PRO779,LEU780,TRP781,ILE797,<br>LYS799,ASP807,TYR833,ILE845,GLU846,VAL847,VAL848,<br>SER851,MET920,PHE928,ILE930,ASP931                                                         |

**Table S2** MM/GBSA calculation score of PI3K $\alpha$ / $\beta$  complexes.

| Energy   | PI3K $\alpha$ (kcal/mol) |                   | PI3K $\beta$ (kcal/mol) |                   |
|----------|--------------------------|-------------------|-------------------------|-------------------|
|          | Compd1                   | Compd2            | Compd1                  | Compd2            |
| Total    | -70.77 $\pm$ 1.02        | -39.46 $\pm$ 0.74 | -30.87 $\pm$ 0.77       | -52.45 $\pm$ 0.94 |
| Coulomb  | -26.16 $\pm$ 0.62        | -15.48 $\pm$ 0.36 | -20.13 $\pm$ 0.35       | -13.05 $\pm$ 0.26 |
| Covalent | 0.22 $\pm$ 0.03          | 8.00 $\pm$ 0.12   | 7.78 $\pm$ 0.16         | 8.04 $\pm$ 0.14   |
| Hbond    | -3.05 $\pm$ 0.06         | -1.01 $\pm$ 0.03  | -1.74 $\pm$ 0.05        | -0.84 $\pm$ 0.02  |
| Lipo     | -22.56 $\pm$ 0.33        | -17.81 $\pm$ 0.17 | -20.12 $\pm$ 0.19       | -22.76 $\pm$ 0.24 |
| Packing  | -0.75 $\pm$ 0.06         | -0.68 $\pm$ 0.04  | -0.66 $\pm$ 0.05        | -0.94 $\pm$ 0.06  |
| SolvGB   | -35.05 $\pm$ 0.32        | 27.32 $\pm$ 0.25  | 35.05 $\pm$ 0.31        | 24.75 $\pm$ 0.26  |
| vdW      | -53.52 $\pm$ 0.52        | -39.78 $\pm$ 0.52 | -31.05 $\pm$ 0.53       | -47.65 $\pm$ 0.34 |
